# Supplementary material
Source: PubMed Central journal article supplement (PMC2757002)
Supplement: NIHMS112362-supplement-1_si_001.pdf [file NIHMS112362-supplement-1_si_001.pdf]

**The importance of negative superhelicity in inducing the formation of G-quadruplex and i-motif structures in the c-Myc promoter: implications for drug targeting and control of gene expression**

Daekyu Sun<sup>1-3\*</sup> and Laurence H. Hurley<sup>1-3\*</sup>

<sup>1</sup>College of Pharmacy, University of Arizona, Tucson, Arizona 85721

<sup>2</sup>BIO5 Institute, 1657 E. Helen Street, Tucson, Arizona 85721

<sup>3</sup>Arizona Cancer Center, 1515 N. Campbell Avenue, Tucson, Arizona 85724

**Contents:** Figure showing Br<sub>2</sub> footprinting of linear DNA

## Supporting Information

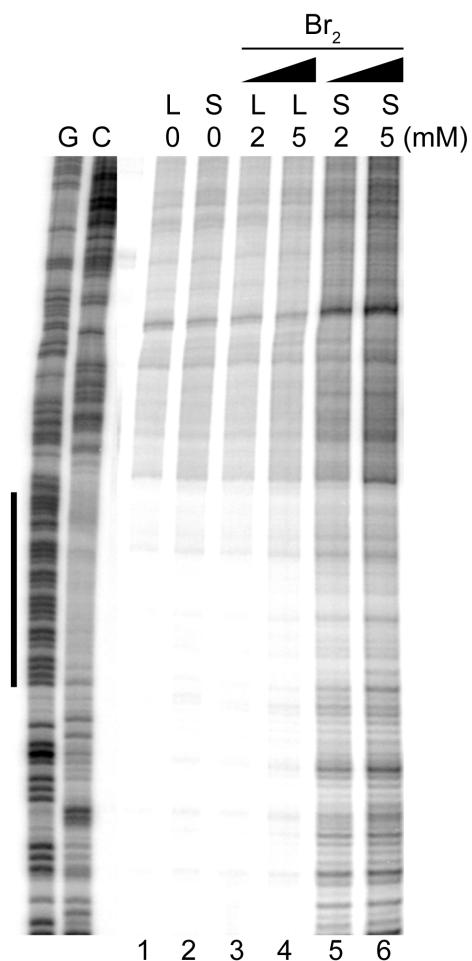

**Figure S1.** Br<sub>2</sub> footprinting of linear DNA. The plasmid was linearized by digestion with EcoRI. Linear (L) (lanes 3 and 4) or supercoiled (S) (lanes 5 and 6) DNA was incubated with Br<sub>2</sub> at either 2 or 5 mM (lanes 3 and 5 and lanes 4 and 6, respectively). Lanes 1 and 2 were not exposed to Br<sub>2</sub>. G and C represent the sequence lanes and the bar to the left of the gel covers the NHE III<sub>1</sub>.
